# Supplementary material for: Within-subject and between-subject biological variation estimates of 21 hematological parameters in 30 healthy subjects
Source: publisher site journal article supplement (doi:10.1515/cclm-2017-1155), 2018-04-04
Supplement: Supplementary file 1 [file cclm-2017-1155_suppl.docx]

**Supplementary Table 1.** Measurands and methods of included CBC parameters.

| Analytes | Methods |
| --- | --- |
| Erythrocytes(RBC),  x 1012/L | Counted (Hydrovynamic vocusing (DC Detection) / Empedans) |
| Hemoglobin (Hgb), g/L | Measured (SLS-Hemoglobin Method) |
| Hematocrit (HTC), % | Calculated,  A: Total volume of the blood sample  k: Constant |
| MCH, pg | Calculated, |
| MCHC, g/dL | Calculated, |
| MCV, fL | Calculated, |
| RDW-SD, fL | Calculated (X2-X1)  With the peak height assumed to be 100%, the distribution width at the 20% frequency level is RDW-SD.  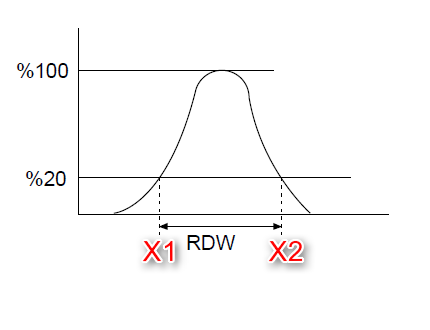 |
| RBC-He, pg | 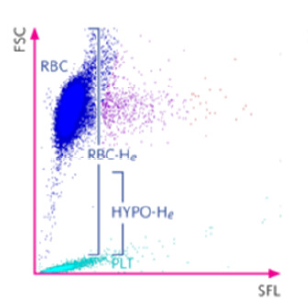 Scattergram ®  RBC-He is a measure of the haemoglobin content of mature red blood cells |
| Reticulocyte, x109/L | Counted (Flow cytometry method using semiconductor laser) |
| RET-He,pg | Scattergram ®  RET-He is a measure of the haemoglobin content in reticulocytes |
| Leukocytes, x109/L | Counted (Flow cytometry method using semiconductor laser) |
| Lymphocytes, x109/L | Counted, (Flow cytometry method using semiconductor laser) |
| Monocytes, x109/L | Counted (Flow cytometry method using semiconductor laser) |
| Neutrophils, x109/L | Counted (Flow cytometry method using semiconductor laser) |
| Eosinophils, x109/L | Counted (Flow cytometry method using semiconductor laser) |
| Basophils, x109/L | Counted (Flow cytometry method using semiconductor laser) |
| PLT-I, x109/L | Counted (Hydroynamic vocusing (DC Detection)/ Empedans) |
| PDW – SD, fL | Calculated, (Y2-Y1)  With the peak height assumed to be 100%, the istribution width at the 20% frequency level is PDW-SD.  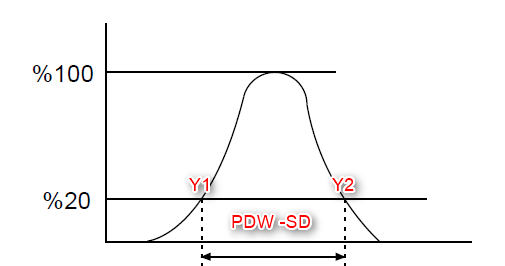 |
| Plateletcrit, % | Calculated,  B: Total volume of PLT in sample  k: Constant |
| MPV, fL | Calculated, |
| P-LCR, % | Calculated,  The P-LCR is the ratio of large platelets from the 12 fL discriminator or larger. It is calculated as a ratio comparing the number of particles between the fixed discriminator and UD, to the number of particles between LD and UD.  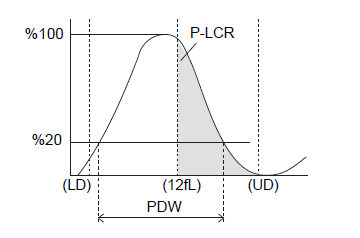 |
